# Supplementary material for: Mobile Phone Interventions for Sleep Disorders and Sleep Quality: Systematic Review
Source: PubMed Central journal article supplement (PMC5608984; doi:10.2196/mhealth.7244), 2017-09-07
Supplement: mhealth_v5i9e131_app2.pdf [file mhealth_v5i9e131_app2.pdf]

|                          | Quality assessment items |    |    |    |    |    |    |    |    |     | Total |
|--------------------------|--------------------------|----|----|----|----|----|----|----|----|-----|-------|
|                          | #1                       | #2 | #3 | #4 | #5 | #6 | #7 | #8 | #9 | #10 |       |
| Anttalainen et al., 2014 | 1                        | 0  | 1  | 1  | 1  | 0  | 1  | 1  | 1  | 0   | 7     |
| Babson et al., 2015      | 1                        | 0  | 1  | 0  | 0  | 0  | 0  | 0  | 1  | 0   | 3     |
| Bauer et al., 2012       | 1                        | 0  | 0  | 1  | 0  | 1  | 0  | 1  | 1  | 0   | 5     |
| Chen et al., 2015        | 1                        | 0  | 0  | 0  | 0  | 0  | 0  | 1  | 0  | 1   | 3     |
| Filion et al., 2015      | 1                        | 0  | 1  | 1  | 1  | 0  | 1  | 1  | 1  | 1   | 8     |
| Fox et al., 2012         | 1                        | 0  | 1  | 1  | 1  | 0  | 1  | 1  | 1  | 1   | 8     |
| Freeman et al., 2015     | 1                        | 0  | 1  | 1  | 1  | 1  | 1  | 1  | 1  | 1   | 9     |
| Ho et al., 2014          | 1                        | 0  | 1  | 1  | 1  | 0  | 1  | 1  | 1  | 1   | 8     |
| Jernelov et al., 2012    | 1                        | 0  | 1  | 1  | 1  | 1  | 1  | 1  | 1  | 1   | 9     |
| Koffel et al., 2016      | 0                        | 0  | 1  | 1  | 1  | 1  | 1  | 1  | 1  | 1   | 8     |
| Lichstein et al., 2013   | 1                        | 0  | 1  | 0  | 1  | 1  | 1  | 1  | 1  | 1   | 8     |
| McCurry et al., 2016     | 1                        | 1  | 0  | 1  | 0  | 0  | 0  | 1  | 1  | 1   | 6     |
| Mendelson et al., 2014   | 1                        | 0  | 1  | 1  | 1  | 1  | 1  | 1  | 1  | 1   | 9     |
| Stremmer et al., 2006    | 1                        | 0  | 1  | 1  | 1  | 1  | 1  | 1  | 0  | 1   | 8     |
| van Dongen et al., 2014  | 1                        | 1  | 1  | 1  | 1  | 0  | 1  | 1  | 1  | 1   | 9     |
| Vuletic et al., 2016     | 1                        | 0  | 1  | 1  | 1  | 0  | 1  | 1  | 1  | 1   | 8     |
